# Supplementary material
Source: PubMed Central journal article supplement (PMC10159904)
Supplement: NIHMS1883040-supplement-1.pdf [file NIHMS1883040-supplement-1.pdf]

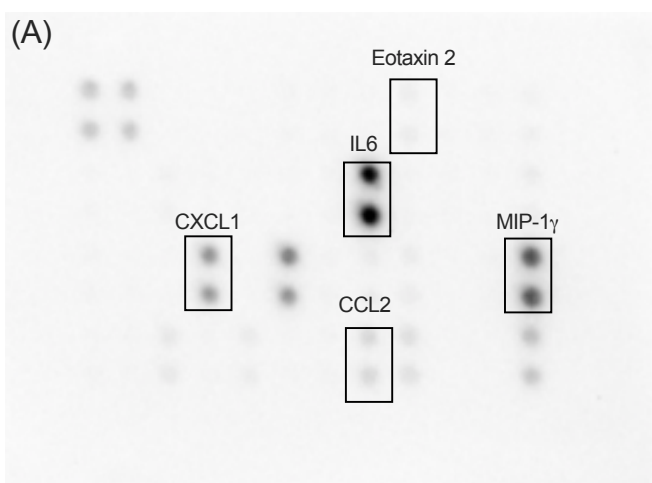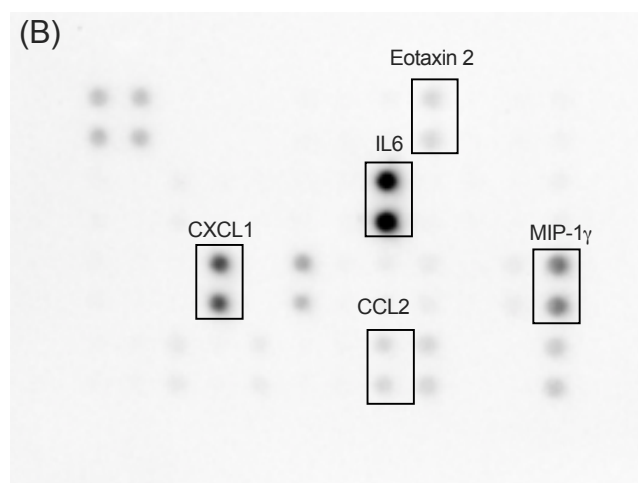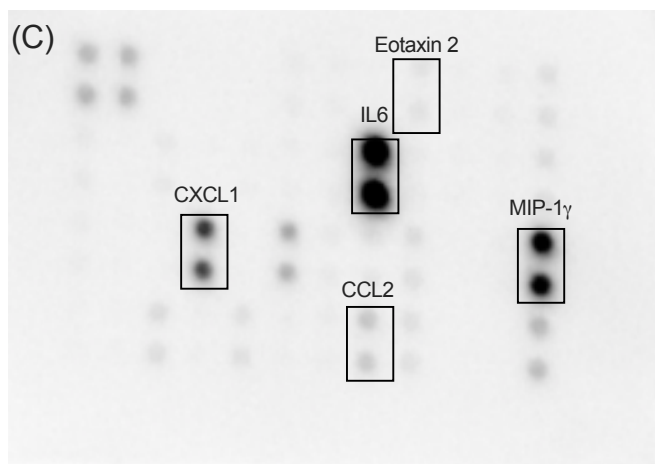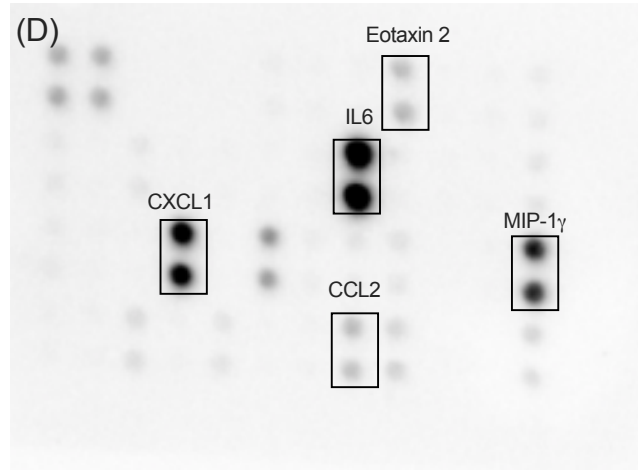

Supplementary Figure S1. Immune dot blots supporting Figure 3D. (A) WT PCLS. (B) *Fzd9*<sup>-/-</sup> PCLS. (C) WT iloprost PCLS. (D) *Fzd9*<sup>-/-</sup> iloprost PCLS.
