# Supplementary material
Source: PubMed Central journal article supplement (PMC10159904)
Supplement: NIHMS1883040-supplement-2.pdf [file NIHMS1883040-supplement-2.pdf]

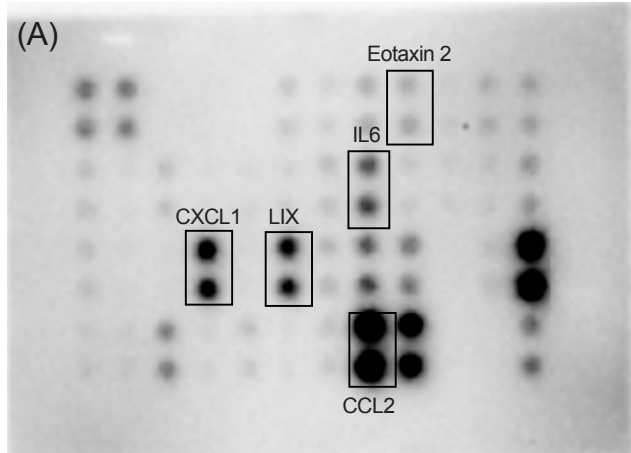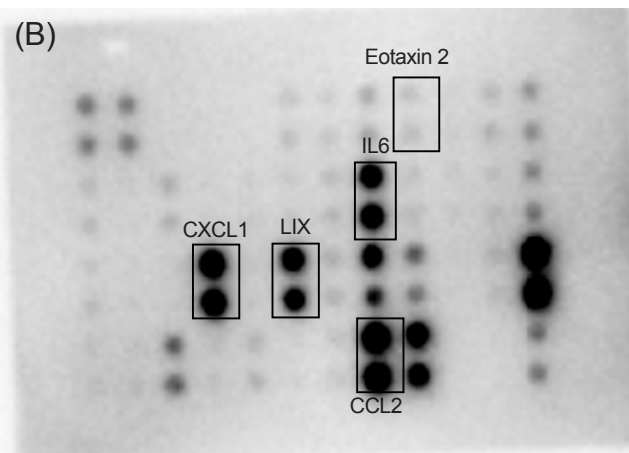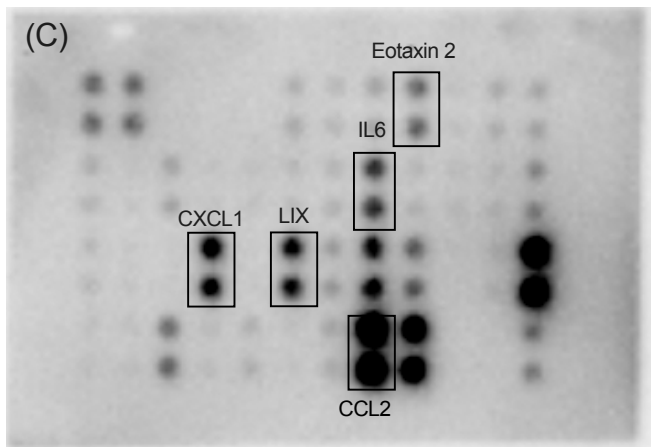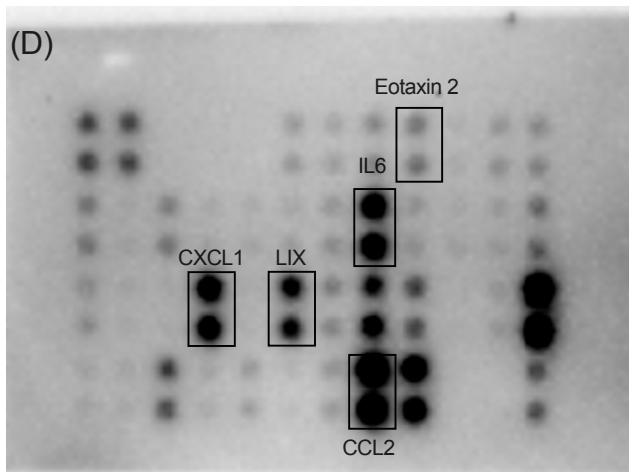

Supplementary Figure S2. Immune dot blots supporting Figure 4C. (A) Saline control PCLS. (B) Urethane control PCLS (C) Saline iloprost PCLS. (D) Urethane iloprost PCLS.
