# Supplementary material
Source: PubMed Central journal article supplement (PMC10159904)
Supplement: NIHMS1883040-supplement-3.pdf [file NIHMS1883040-supplement-3.pdf]

WT

Fzd9<sup>-/-</sup>

Vehicle



DAPI (DAPI)

B220 (Opal 540)

CD3 (Opal 570)

CD4 (Opal 650)

CD45 (Opal 620)

CD8 (Opal 520)

F480 (Opal 780)

Autofluorescence

ILO



**Supplementary Figure S3.** Representative images (supporting Fig. 5) from the Vectra Polaris immunofluorescence assay that identified cells in WT and *Fzd9*<sup>-/-</sup> PCLS treated with iloprost (10 $\mu$ M) or vehicle for 7 days. Dapi, blue; B220, yellow; CD3, orange; CD4, magenta; CD45, cyan; CD8, green; F4/80, pink. Images collected at 20x. Scale, 1.9 $\mu$ m=1mm. WT, wild type; ILO, iloprost.
