# Supplementary material
Source: PubMed Central journal article supplement (PMC10159904)
Supplement: NIHMS1883040-supplement-6.pdf [file NIHMS1883040-supplement-6.pdf]

Supplementary Table S1. Map of protein dot blot (supporting methods and Figures 3D and 4C).

|   | A      | B       | C      | D     | E      | F      | G      | H         | I         | J      | K           | L              |
|---|--------|---------|--------|-------|--------|--------|--------|-----------|-----------|--------|-------------|----------------|
| 1 | POS    | POS     | NEG    | NEG   | Blank  | CXCL13 | TNFSF8 | Eotaxin 1 | Eotaxin 2 | TNFSF6 | Fractalkine | GCSF           |
| 2 |        |         |        |       |        |        |        |           |           |        |             |                |
| 3 | GM-CSF | IFN-g   | IL-1a  | IL-1b | IL-2   | IL-3   | IL-4   | IL-6      | IL-9      | IL-10  | IL-12       | IL-12 p70      |
| 4 |        |         |        |       |        |        |        |           |           |        |             |                |
| 5 | IL-13  | IL-17a  | CXCL11 | CXCL1 | Leptin | LIX    | XCL1   | CCL2      | M-CSF     | MIG    | MIP-1a      | MIP-1 $\gamma$ |
| 6 |        |         |        |       |        |        |        |           |           |        |             |                |
| 7 | Rantes | CXCL12a | CCL1   | CCL25 | TIMP-1 | TIMP-2 | TNFa   | TNFRI     | TNFRII    | Blank  | Blank       | POS            |
| 8 |        |         |        |       |        |        |        |           |           |        |             |                |
