# Supplementary material
Source: PubMed Central journal article supplement (PMC10159904)
Supplement: NIHMS1883040-supplement-7.pdf [file NIHMS1883040-supplement-7.pdf]

Supplementary Table S2. Vectra Polaris antibodies (supporting methods and Fig. 5).

| Vectra Polaris Antibodies |        |                                   |     |                 |          |
|---------------------------|--------|-----------------------------------|-----|-----------------|----------|
| Ab1                       | Conc.  | Supplier                          | Ab2 | Conc.           | Supplier |
| CD3                       | 1:50   | Cell Signalling Technology D4V8L  | 570 | 1:150           | Akoya    |
| FOXP3                     | 1:200  | R&D Systems MAB8214               | 690 | 1:50            | Akoya    |
| CD8                       | 1:400  | Cell Signalling Technology 98941S | 520 | 1:150           | Akoya    |
| B220                      | 1:1000 | PD Pharm 55086                    | 540 | 1:150           | Akoya    |
| CD4                       | 1:200  | Ebio Invitrogen 14-9766-82        | 650 | 1:300           | Akoya    |
| CD45                      | 1:100  | Cell Signalling Technology D3F8Q  | 620 | 1:100           | Akoya    |
| Vimentin                  | 1:50   | Cell Signalling Technology 5741S  | 480 | 1:150           | Akoya    |
| F480                      | 1:100  | Cell Signalling Technology 30325S | 780 | 1:25; Dig 1:100 | Akoya    |
