# Supplementary material
Source: PubMed Central journal article supplement (PMC10159904)
Supplement: NIHMS1883040-supplement-8.pdf [file NIHMS1883040-supplement-8.pdf]

Supplementary Table S3. Vectra Polaris marker combinations used to identify immune cell types (supporting methods and Fig. 5).

| <b>Cell type</b>     | <b>Vectra Polaris marker combination</b> |
|----------------------|------------------------------------------|
| Total T cells        | CD45+/CD3+                               |
| CD8 T cells          | CD45+/CD3+/CD8+                          |
| CD4 T cells          | CD45+/CD3+/CD4+                          |
| T regulatory cells   | CD45+/CD4+/FoxP3+                        |
| Macrophages          | CD45+/F480+                              |
| B cells              | CD45+/B220+                              |
| Total Leukocytes     | CD45+                                    |
| Total non-leukocytes | CD45-                                    |
